# Supplementary material for: Intratumoral distribution of EGFR mutations and copy number in metastatic lung cancer, what impact on the initial molecular diagnosis?
Source: J Transl Med. 2014 May 16;12:131. doi: 10.1186/1479-5876-12-131 (PMC4041917; doi:10.1186/1479-5876-12-131)
Supplement: Additional file 1: Table S1 — Detailed results showing multilocalisation screening for EGFR mutation and EGFR CNV. [file 1479-5876-12-131-S1.xls]

## Sheet: Feuil1
samples	Sex	age at diagnostic	Tobacco pack per year	TNM stage (2009) at initial diagnosis	DNA sample number	Tumor cell content	Sample type	predominant architectural pattern	Mutation result	del/ins type	CNV
P1	1	58	50	IIIA	724a	0.5	surgical :lobectomy	lepidic	del19	DEL5AA	1.89
					724b	0.9	surgical :lobectomy	solid	del19	DEL5AA	3.44
					724c	0.9	surgical :lobectomy	solid	del19	DEL5AA	2.55
					724d	0.85	surgical :lobectomy	solid	del19	DEL5AA	2.88
					724e	0.9	surgical :lobectomy	solid	del19	DEL5AA	3.54
					724f	0.8	surgical :lobectomy	solid	del19	DEL5AA	2.31
					724g	0.6	surgical :lobectomy	solid	del19	DEL5AA	3.71
P2	2	52	0	IA	349a	0.7	surgical: Wedge resection	acinar	del19	DEL6AA	1.94
					349b	0.3	surgical: Wedge resection	acinar	del19	DEL6AA	2.27
P3	1	64	15	IV	144a	0.6	surgical: pleural biopsy		del19	DEL6AA	Not contributive
					144b	0.5	surgical: pleural biopsy		del19	DEL6AA	1.66
					144c	0.05	pleural effusion		WT	DEL6AA	0.77
					144d	0.4	surgical: pleural biopsy		del19	DEL6AA	1.83
P4	2	70	35	IV	491a	0.05	surgical: pleural biopsy		del19	DEL5AA	Not contributive
					491b	0.7	surgical: pleural biopsy		del19	DEL5AA	1.64
					491c	0.4	surgical: pleural biopsy		del19	DEL5AA	0.75
					491d	0.2	pleural effusion		del19	DEL5AA	2.29
					491e	0.4	surgical: pleural biopsy		del19	DEL5AA	2.77
P5	2	81	0	IV	659a	0.7	surgical: pleural biopsy		del19	DEL5AA	2.06
					659b	0.6	surgical: pleural biopsy		del19	DEL5AA	1.73
					659c	0.75	pleural effusion		del19	DEL5AA	2.11
					659d	0.6	surgical: pleural biopsy		del19	DEL5AA	2.62
P6	2	74	18	Unknown	197a	0.05	transthoracic biopsy		del19	DEL6AA	2.02
					197b	0.5	transthoracic biopsy		del19	DEL6AA	2.56
P7	2	80	Unknown	IV	112a	0.02	pleural effusion		del19	DEL5AA	2.29
					112b	0.9	pleural effusion		del19	DEL5AA	3
P8	1	50	26	IV	149a	0.95	transthoracic biopsy		del19	DEL5AA	1.71
					149b	0.95	transthoracic biopsy		del19	DEL5AA	3.17
P9	2	42	0	IV	122b	0.1	surgical: pleural biopsy		del19	DEL5AA	1.89
					122c	0.8	surgical :lobectomy	acinar	del19	DEL5AA	2.18
					122d	0.9	surgical :lobectomy	acinar	del19	DEL5AA	1.92
					122a	0.7	surgical :lobectomy	acinar	del19	DEL5AA	2.73
P10	1	58	30	IV	198b	0.6	surgical: pleural biopsy		del19	DEL6AA	Not contributive
					198c	0.02	surgical: pleural biopsy		del19	DEL6AA	Not contributive
					198a	0.5	surgical: pleural biopsy		del19	DEL6AA	2.15
P11	1	57	Unknown	IV	201b	0.7	surgical: pleural biopsy		del19	DEL5AA	6.9
					201c	0.8	surgical: pleural biopsy		del19	DEL5AA	4.64
					201a	0.4	surgical: pleural biopsy		del19	DEL5AA	6.61
P12	2	66	Unknown	IV	249b	0.05	surgical: pleural biopsy		Not contributive		1.57
					249c	0.1	surgical: pleural biopsy		del19	DEL5AA	1.87
					249a	0.1	surgical: pleural biopsy		del19	DEL5AA	2.95
P13	1	71	60	IIB	403b	0.4	surgical :lobectomy	lepidic	del19	DEL6AA	1.54
					403c	0.3	surgical :lobectomy	in situ adenocarcinoma	del19	DEL6AA	1.34
					403d	0.7	surgical :lobectomy	acinar	del19	DEL6AA	1.87
					403a	0.5	surgical :lobectomy	papillary	del19	DEL6AA	2.31
P14	2	75	Unknown	IB	444b	0.4	surgical :lobectomy	lepidic	del19	DEL5AA	1.43
					444a	0.8	surgical :lobectomy	acinar	del19	DEL5AA	1.53
P15	2	59	10	IV	451b	0.3	surgical: pleural biopsy		del19	DEL5AA	1.41
					451c	0.9	pleural effusion		del19	DEL5AA	1.42
					451a	0.2	surgical: pleural biopsy		del19	DEL5AA	2.16
P16	1	79	40	Unknown	500a	0.1	bronchial biopsy		WT		Not contributive
					500b	0.05	bronchial aspiration		WT		1.51
					500c	0.8	bronchial biopsy		del19	DEL5AA	Not contributive
P17	2	68	0	IIIA	510b	0.6	surgical :lobectomy	papillary	del19	DEL5AA	2.5
					510c	0.5	surgical :lobectomy	papillary	del19	DEL5AA	2.08
					510a	0.6	surgical :lobectomy	papillary	del19		Not contributive
P18	1	75	30	IIIB	660b	0.03	bronchial aspiration		Not contributive		1.56
					660a	0.7	surgical :lymph node		del19	DEL5AA	Not contributive
P19	1	72	Unknown	IIA	457a	0.4	surgical :Wedge resection	lepidic	del19	DEL5AA	Not contributive
					457b	0.7	transthoracic biopsy	acinar	del19	DEL5AA	2.4
P20	1	78	0	IIIA	252b	0.8	surgical :lymph node before chemotherapy	acinar	G719A		2.91
					252c	0.2	surgical :lymph node after chemotherapy	acinar	G719A		2.42
					252d	0.4	surgical :lymph node after chemotherapy	acinar	G719A		2.44
					252a	0.6	surgical :lobectomy after chemotherapy	acinar	G719A		Not contributive
					252e	0.5	surgical :lymph node relapse	acinar	G719A		Not contributive
P21	2	76	0	IIIA	685b	0.7	surgical :lobectomy	micropapillary	G719A		1.64
					685c	0.4	surgical :lobectomy	acinar	G719A		1.79
					685d	0.7	surgical :lobectomy	micropapillary	G719A		1.16
					685e	0.6	surgical :lobectomy	micropapillary	G719A		1.48
					685f	0.2	surgical :lymph node	solid	G719A		1.46
					685g	0.3	surgical :lymph node	solid	G719A		1.21
					685h =a	0.4	surgical :lobectomy	micropapillary	G719A		Not contributive
P22	1	65	40	IV	572a	0.5	surgical: Wedge resection	acinar	ins20	INS3AA	2.43
					572b	0.8	surgical: Wedge resection	acinar	ins20	INS3AA	2.36
					572c	0.5	surgical :lymph node	acinar	ins20	INS3AA	3.96
					572d	0.7	surgical: Wedge resection	acinar	ins20	INS3AA	2.69
P23	2	50	20	IV	94a	0.6	surgical: pleural biopsy		ins20	INS3AA	0.9
					94b	0.7	surgical: pleural biopsy		ins20	INS3AA	1.36
P24	2	48	0	IIIA	656a	0.15	surgical :lymph node	acinar	Not contributive		1.51
					656b	0.1	surgical :lymph node	acinar	ins20	INS2AA	1.5
					656c	0.3	surgical :lobectomy	acinar	ins20	INS2AA	1.56
					656d	0.2	surgical :lobectomy	acinar	ins20	INS2AA	1.61
					656e	0.1	surgical :lobectomy	acinar	ins20	INS2AA	Not contributive
P25	1	65	0	IV	120b	0.05	surgical: pleural biopsy		ins20	INS3AA	1.46
					120a	0.3	surgical: pleural biopsy		ins20	INS3AA	3.94
P26	2	63	5	IB	263b	0.2	surgical :lobectomy	lepidic	ins20	INS3AA	1.45
					263c	1	surgical :lobectomy	papillary	ins20	INS3AA	1.56
					263a	0.8	surgical :lobectomy	papillary	ins20	INS3AA	1.85
P27	2	72	0	IV	408b	0.9	surgical :lobectomy	lepidic	Not contributive		1.89
					408c	0.05	surgical :lobectomy	lepidic	WT		1.46
					408e	0.8	surgical :lymph node	papillary	ins20	INS3AA	1.27
					408f	0.1	surgical :lymph node	papillary	WT		1.57
					408a	0.8	surgical :lobectomy	papillary	ins20	INS3AA	Not contributive
P28	2	60	Unknown	IIA	334a	0.7	surgical :lobectomy	papillary	L858R		1.07
					334b	0.6	surgical :lymph node	papillary	L858R		1.21
					334c	0.6	surgical :lobectomy	papillary	L858R		1.77
					334d	0.7	surgical :lobectomy	papillary	L858R		1.71
					334e	0.1	surgical :lymph node	papillary	L858R		1.41
					334f	0.8	surgical :lobectomy	papillary	L858R		1.46
P29	2	68	Unknown	Unknown	147a	0.05	bronchial biopsy		L858R		2.12
					147b	0.4	bronchial biopsy		L858R		3.11
P30	2	64	0	IV	638a	0.9	surgical :lobectomy	acinar	L858R		1.81
					638b	0.7	surgical :lobectomy	acinar	L858R		1.74
P31	2	46	5	IIIA	06a	0.7	surgical :lobectomy	acinar	L858R		1.66
					06b	0.8	surgical :lobectomy	acinar	L858R		2.33
					06c	0.7	surgical :lobectomy	acinar	L858R		1.93
P32	2	81	Unknown	IV	262a	0.7	surgical: pleural biopsy		L858R		0.25
					262b	0.1	surgical: pleural biopsy		L858R		4.17
					262c	0.2	pleural effusion		L858R		3.03
					262d	0.9	surgical: pleural biopsy		L858R		1.69
P33	1	61	Unknown	IV	148a	0.9	surgical: pleural biopsy		L858R		2.72
					248b	0.7	surgical: pleural biopsy		L858R		2.37
					248c	0.6	surgical: pleural biopsy		L858R		Not contributive
P34	2	55	Unknown	IV	60b	0.05	bronchial biopsy		L858R		2.84
					60c	0.6	pleural effusion		L858R		Not contributive
					60a	0.2	surgical: pleural biopsy		L858R		Not contributive
P35	2	72	0	IIIA	159b	0.8	surgical :lobectomy	solid	L858R		2.2
					159c	0.8	surgical :lobectomy	solid	L858R		2.31
					159d	0.8	surgical :lobectomy	solid	L858R		2.21
					159e	0.05	surgical :lymph node	solid	L858R		1.76
					159f	0.07	surgical :lymph node	solid	L858R		1.91
					159a	0.5	surgical :lobectomy	solid	L858R		2.21
P36	2	64	0	IV	638b	0.05	surgical :lobectomy	lepidic	L858R		1.8
					638c	0.7	surgical :lobectomy	lepidic	L858R		1.87
					638a	0.5	surgical :lobectomy	acinar	L858R		Not contributive
P37	2	61	15	IIIA	405b	0.7	surgical :lobectomy	acinar	L858R		1.84
					405c	0.9	surgical :lymph node	acinar	L858R		1.59
					405a	0.8	surgical :lobectomy	acinar	L858R		Not contributive
P38	2	72	0	IB	671b	0.9	surgical :lobectomy	papillary	L858R		1.84
					671c	0.1	surgical :lobectomy	atypical adenomatous hyperplasia	L858R		3.43
					671a	0.5	surgical :lobectomy	papillary	L858R		0.76
P39	2	67	20	IIA	686b	0.4	surgical :lobectomy	lepidic	L858R		1.51
					686c	0.8	surgical :lobectomy	lepidic	L858R		1.78
					686a	0.8	surgical :lobectomy	acinar	L858R		Not contributive
P40	2	52	Unknown	IV	585a	0.6	surgical: Wedge resection	lepidic	L861Q/T790M		Not contributive
					585b	1	surgical: Wedge resection	lepidic	L861Q/T790M		1.21
					585c	1	surgical: Wedge resection	lepidic	L861Q/T790M		1.09
					585d	1	surgical: Wedge resection	lepidic	L861Q/T790M		0.28
					585e	1	surgical: Wedge resection	lepidic	L861Q/T790M		1.44
					585f	1	surgical: Wedge resection	lepidic	L861Q/T790M		1.22
					585g	1	surgical: Wedge resection	lepidic	L861Q/T790M		1.14
					585h	1	surgical: Wedge resection	lepidic	L861Q/T790M		1.31
					585i	1	surgical: Wedge resection	lepidic	L861Q/T790M		1.21
					585j	1	surgical: Wedge resection	lepidic	L861Q/T790M		1.39
					585k	1	surgical: Wedge resection	lepidic	L861Q/T790M		1.9
					585l	1	surgical: Wedge resection	lepidic	L861Q/T790M		0.89
					585m	1	surgical: Wedge resection	lepidic	L861Q/T790M		1.08
					585n	1	surgical: Wedge resection	lepidic	L861Q/T790M		1.16
					585o	1	surgical: Wedge resection	lepidic	L861Q/T790M		1.54
					585p	1	surgical: Wedge resection	lepidic	L861Q/T790M		1.79
					585q	1	surgical: Wedge resection	lepidic	L861Q/T790M		1.33
					585r	1	surgical: Wedge resection	lepidic	L861Q/T790M		1.48
					585s	1	surgical: Wedge resection	lepidic	L861Q/T790M		2.23
